# Supplementary material
Source: HighWire-hosted journal article supplement (https://www.cmajopen.ca/highwire/filestream/81329/field_highwire_adjunct_files/1/2019-0200-original-submission.pdf)
Supplement: 2019-0200-original-submission.pdf [file 2019-0200-original-submission.pdf]

# Long-term Disability in Survivors of Gun Injury

Sheharyar Raza, HBSc MD [1, 2]

Deva Thiruchelvam, MSc [2, 3]

Donald A. Redelmeier, MD MS(HSR) [1, 2, 3, 4, 5]

## Affiliations:

[1] Department of Medicine, University of Toronto, Toronto, Canada

[2] Evaluative Clinical Sciences, Sunnybrook Research Institute

[3] Institute of Clinical Evaluative Sciences (ICES) in Ontario

[4] Institute for Health Policy Management and Evaluation

[5] Division of General Internal Medicine, University of Toronto

Short title: Survivors of Gun Injury

Correspondence: Donald A. Redelmeier  
Sunnybrook Health Sciences Centre, G-151  
2075 Bayview Ave, Ontario, CANADA M4N 3M5

voice: (416) 480-699      fax: (416) 480-6048

email: [dar@ices.on.ca](mailto:dar@ices.on.ca)

words: 2,298      tables: 3      figures: 2

Funding: Supported by a Canada Research Chair in Medical Decision Sciences and the Canadian Institutes of Health Research.

Keywords: Trauma Survivorship; Gunshot Wound; Return to Work; Penetrating Trauma; Substance Abuse; Gun Violence;

**ABSTRACT**

**BACKGROUND:** Intentional and unintentional gun injury is a frequent cause of death that generates substantial immediate attention. We examined the risks of subsequent long-term disability for patients surviving acute injury.

**METHODS:** We conducted a population-based individual-patient longitudinal analysis of adults injured by firearms who received emergency medical care in Ontario, Canada, from April 1, 2002 and April 1, 2018. The primary outcome was death or subsequent application for long-term disability in the years following hospital discharge.

**RESULTS:** In total, 5,103 patients were injured from firearms including 10% from intentional incidents and 90% from unintentional incidents. After a median 7.31 years of follow-up, patients surviving intentional injuries had a disability rate twice as high as patients surviving unintentional injuries (28.2% vs 11.9%,  $p < 0.001$ ), equivalent to a relative risk of 2.67 (95% confidence interval 2.20 to 3.24). The higher risk of long-term disability for survivors following intentional gun injury was not explained by baseline demographics, extended to survivors treated and released from the emergency department, and was observed regardless of whether the incident was self-inflicted or from inter-personal assault. Half of the disability cases occurred after the first year. Additional predictors of long-term disability included a lower socioeconomic status, an urban home location, a nighttime incident time, a past history of mental illness, and a substance abuse diagnosis.

**INTERPRETATION:** Gun injury death statistics underestimate the extent of health losses from long-term disability, particularly for those with intentional injuries. More sustained follow-up care might improve patient outcomes.

## INTRODUCTION

Guns can be useful for hunting excursions, shooting sports, and self-defense. The Inuit living in wilderness regions, for example, rely on guns for securing food and protecting against animal attacks.<sup>1</sup> A large downside of guns is the risk of injury. Mortality from gun injury in Canada amounts to 800 total deaths annually, equivalent to a rate of 23 per million population yearly.<sup>2</sup> An estimated 700 fewer Canadians would die from gun injury each year if mortality rates in Canada matched those in the United Kingdom.<sup>3 4</sup> Of course, some countries have higher mortality from gun injury including the United States with a rate of around 200 per million population yearly.<sup>5</sup>

Many people survive gun injury which means mortality rates underestimate the total burden of suffering.<sup>6</sup> Indeed, some patients with through-and-through brain injuries stay alive but institutionalized.<sup>7</sup> The intensity of acute pain can be severe and lasting.<sup>8</sup> Up to half of patients show anxiety, depression, or other stress during hospitalization.<sup>9 10</sup> Disfigurement can lead to a further cascade of complications.<sup>11</sup> Of course, some patients view survivorship as a source of personal pride, community prestige, or divine intervention.<sup>12 13</sup> Aside from reports after military combat, however, rigorous studies are near-silent about long-term prognosis and focus on acute care survival.<sup>14 15 16</sup>

We postulated that rates of long-term disability are substantial following gun injury, contrary to the acute nature of the injury and the frequently impressive initial hospital recovery. Moreover, we hypothesized that intentional gun injury, relative to unintentional gun injury, would lead to a greater burden of long-term disability due to the differences in wound anatomy, patient characteristics, injury circumstances, injury severity, psychological damage, and community supports.<sup>17 18 19</sup> Herein we explore this distinction and apply population-wide healthcare databases to examine long-term outcomes for patients who survive gun injury.

## METHODS

### Study Setting

1 Ontario is Canada's largest province with a population of 13,069,182 in 2010  
2 (study midpoint) distributed over 1,074,845 square kilometers of land area (urban and  
3 rural).<sup>20 21</sup> Hunting season extended mostly from September to December each year and  
4 was a popular activity in rural regions.<sup>22</sup> Emergency care was universally available with  
5 no user fees for all 178 different hospitals and the healthcare data could be tracked  
6 through encrypted databases.<sup>23 24</sup> Prevailing laws included a legal mandate for medical  
7 reporting of all patients who experienced gun injury.<sup>25</sup> Diverse disability programs were  
8 available for adults above age 18 years based on physician assessments that were  
9 included in healthcare databases.<sup>26</sup>

### 20 Gun Injury

21 We identified adults aged 16 years or older injured by firearms who received  
22 emergency medical care between April 1, 2002 and April 1, 2018. These dates provided a  
23 comprehensive sample of all years available and a minimum one-year follow-up for each  
24 patient. Diagnostic codes were based on the International Classification of Disease  
25 Version 10 (codes W32-W34) as validated in past research.<sup>27</sup> We excluded patients living  
26 outside of Ontario, individuals without a valid healthcard number, those dead at the  
27 scene, and youth less than 16 years old (to account for age-based eligibility for disability  
28 support). Patients with more than 1 injury were analyzed by first presentation to avoid  
29 statistical artifacts and provide conservative estimates.

### 40 Additional Characteristics

41 Information on patient age, sex, home location, and socioeconomic income  
42 quintile was based on linked demographic databases.<sup>28</sup> Additional linked databases  
43 identified the time of the incident (year, month, day, hour), firearm type (hand gun, long  
44 gun, uncertain), and whether the patient arrived by ambulance.<sup>29</sup> Intentional injuries were  
45 defined as self-inflicted or from inter-personal assault according to physician diagnostic  
46 codes, with remaining or uncertain cases presumed unintentional.<sup>30</sup> We further searched  
47 linked outpatient databases in the prior year to identify earlier psychiatric illnesses and  
48 substance abuse diagnoses.<sup>31</sup> General healthcare utilization indicators in the prior year  
49 also included total hospitalizations, emergency visits, and outpatient visits.<sup>32 33</sup>

### Short-term Care

We examined short-term clinical outcomes for descriptive purposes to corroborate past studies.<sup>34 35 36 37</sup> Hospital mortality included the count of patients who died in the emergency department, during initial hospitalization, or after transfer to a specialized trauma center.<sup>38</sup> Hospital length of stay indicated the total time in days from arrival in the emergency department to death, discharge, or departure (including patients who left against medical advice).<sup>39</sup> The number of operations, use of transfusion products, and days in intensive care were identified, taking into account those who had none. The available databases lacked information on race, injury circumstances, bullet caliber, vital signs, imaging scans, functional status, formal education, and criminal records.<sup>40</sup>

### Long-term Disability

The primary analysis involved a longitudinal cohort comparison to evaluate the subsequent rate of death or long-term disability for patients who survived initial injury. We considered disability as the primary outcome accounting for death as a competing risk (each component also tested separately in secondary analysis). We defined disability as the submission of a new disability support application because the document was available, measurable, authenticated, and incorporated the patient's perspective.<sup>41</sup> Such applications must involve the patient's physician which, in turn, allowed tracking of applications using physician codes in the Ontario Health Insurance Plan (K050-K054).<sup>42</sup> <sup>43</sup> These techniques have been validated in past research.<sup>44</sup>

### Role of Involved Agencies

The study protocol was approved by the Research Ethics Board of Sunnybrook Hospital including a waiver for direct patient consent. The study was conducted using privacy and security safeguards at the Institute for Clinical Evaluative Sciences (ICES) funded from the Ontario Ministry of Health and Long-Term Care (no endorsement from the Ontario government is intended or should be inferred). The funding organizations had no role in the design and conduct of the study; collection, management, analysis, or interpretation of the data; and in preparation, review, or approval of the manuscript. No

1 funding was received from a federal agency prohibited from advocating or promoting gun  
2 control.<sup>45 46</sup>  
3  
4  
5

## 6 7 Statistical Analysis

8  
9 Our primary comparison tested whether rates of subsequent disability in the years  
10 following gun injury might be higher for those with intentional compared to unintentional  
11 injuries. We defined the follow-up interval as starting on the day of hospital departure  
12 and included only those who survived initial injuries. We used unadjusted cumulative  
13 incidence curves to evaluate survivors for death or disability during the decade following  
14 injury.<sup>47</sup> We further examined the rate of death and disability of the full cohort of  
15 survivors before and after adjusting for additional measured baseline characteristics using  
16 the Fine and Gray model of competing risks (sub-distributional hazard ratios used as the  
17 estimate of relative risks).<sup>48</sup>  
18  
19  
20  
21  
22  
23  
24  
25  
26  
27  
28

## 29 **RESULTS**

### 30 Descriptive Overview

31  
32 In total, 5,103 individuals were injured by firearms and received emergency  
33 medical care during the 16-year study period. Most (90%) were unintentional injuries and  
34 relatively few (10%) were intentional injuries (Table 1). Both groups were mostly men,  
35 less than 30 years old, and widely distributed across socioeconomic status quintiles. The  
36 group with intentional injuries, relative to the group with unintentional injuries, tended to  
37 be younger, injured by a hand gun, living in a city, and to have arrived by ambulance.  
38 Weekends were frequent in both groups and a nighttime incident was disproportionately  
39 frequent for those with intentional injuries (Appendix §1). For both groups, relatively few  
40 had a past hospitalization or a past mental health diagnosis.  
41  
42  
43  
44  
45  
46  
47  
48  
49  
50

51  
52 \*\*\* Table 1 About Here \*\*\*  
53  
54

### 55 Acute Care Outcomes

1 A total of 1,103 patients were admitted to hospital. Among those admitted to  
 2 hospital, about two-thirds required a surgical procedure, one-third required critical care,  
 3 and one-quarter received transfusion products. Overall, the cohort accounted for 2,864  
 4 days in critical care and 10,839 days of hospital stay. The general profile of short-term  
 5 acute hospital care suggested greater severity of injuries for patients with intentional  
 6 compared to unintentional gun injury as measured by hospital admission rates, surgical  
 7 procedures, critical care, blood transfusions, median days in hospital, and risk of acute  
 8 death (Table 2). A total of 471 patients with intentional gun injury and 4,431 patients  
 9 with unintentional gun injury survived initial injuries.  
 10  
 11  
 12  
 13  
 14  
 15  
 16  
 17  
 18  
 19

20 \*\*\* Table 2 About Here \*\*\*  
 21  
 22  
 23

#### 24 Subsequent Rates of Disability

25 The 4,902 total survivors accounted for 37,911.7 patient-years of subsequent  
 26 follow-up (mean: 7.31 years). Patients surviving intentional gun injury accounted for 133  
 27 subsequent cases of disability over 3,163.4 patient-years of follow-up (mean: 6.72 years),  
 28 equal to an incidence of 42 per 1,000 patients annually. Patients surviving unintentional  
 29 gun injury accounted for 529 subsequent cases of disability over 34,748.3 patient-years of  
 30 follow-up (mean: 7.85 years), equal to an incidence of 15 per 1,000 patients annually.  
 31 Together, intentional gun injury was associated with a 2.67 relative increase of  
 32 subsequent disability (95% confidence interval 2.20 to 3.24,  $p < 0.001$ ). Half of the  
 33 disability cases occurred after the first year (Figure 1).  
 34  
 35  
 36  
 37  
 38  
 39  
 40  
 41  
 42  
 43  
 44  
 45  
 46  
 47

48 \*\*\* Figure 1 About Here \*\*\*  
 49  
 50  
 51  
 52  
 53  
 54  
 55  
 56  
 57  
 58  
 59  
 60

#### 59 Additional Predictors of Disability

60 The risk of subsequent disability associated with gun injury was also related to  
 patient characteristics. Lower socioeconomic status, an urban home location, a nighttime  
 incident time, and ambulance arrival were each associated with higher risks. A past  
 diagnosis of mental illness or substance abuse was also associated with higher risks, as  
 were measures of short-term hospital care. Conversely, long-gun firearms were

1 associated with lower risks. Patient age and sex were not significant predictors. Neither  
2 day nor month was a significant predictor. Adjustment for all measured patient  
3 characteristics suggested intentional gun injury was associated with a 1.76 relative  
4 increase of subsequent disability (95% confidence interval 1.43 to 2.17,  $p < 0.001$ ).  
5  
6  
7  
8  
9

10 \*\*\* Table 3 About Here \*\*\*  
11  
12  
13

### 14 Secondary Analyses of Subgroups

15  
16 The higher relative risk of subsequent disability associated with intentional gun  
17 injury extended to important subgroups. In particular, the higher risk was observed for  
18 those treated-and-released from the emergency department and for those admitted to  
19 hospital (Appendix §2). Similarly, the higher risk was observed regardless of a past  
20 history of mental illness, substance abuse, firearm weapon type, ambulance involvement,  
21 healthcare in the prior year, acute need for surgery, or length of hospital stay. The higher  
22 risk was about the same for incidents that were self-inflicted and those from inter-  
23 personal assault. No subgroup showed contrary findings and all subgroups with over 500  
24 patients showed a statistically significant higher relative risk.  
25  
26  
27  
28  
29  
30  
31  
32  
33  
34

### 35 Subsequent Mortality

36  
37 The higher risks of subsequent disability associated with intentional gun injury  
38 was also associated with a higher risk of subsequent mortality, although the absolute  
39 counts were modest. Patients surviving intentional gun injury accounted for 22  
40 subsequent deaths, equal to an incidence of 7 per 1,000 patients annually. Patients  
41 surviving unintentional gun injury accounted for 122 subsequent deaths, equal to an  
42 incidence of 4 per 1,000 patients annually. Together, intentional gun injury was  
43 associated with a 1.72 relative increase (95% confidence interval 1.09 to 2.71,  $p =$   
44 0.0197). Additional predictors of subsequent mortality included older patient age, lower  
45 socioeconomic status, an incident occurring at night, and a mental illness diagnosis.  
46  
47  
48  
49  
50  
51  
52  
53  
54  
55

56 \*\*\* Figure 2 About Here \*\*\*  
57  
58  
59  
60



## INTERPRETATION

We studied gun injury to assess long-term rates of disability. We found that most patients survived initial hospitalization and many later became disabled. Rates of long-term disability were substantial, thereby amounting to one-in-four patients with intentional injuries and one-in-ten patients with unintentional injuries. The higher relative risk of long-term disability following intentional injury was not fully explained by baseline patient demographics, occurred regardless of whether the incident was self-inflicted or from inter-personal assault, and extended to those who were not admitted to hospital. Together, these data suggest mortality statistics underestimate gun injury because many patients do not lose their lives but lose their livelihoods.<sup>49 50</sup>

Our study has many limitations. The patients were injured mostly in isolated incidents and provide little insight about gang violence or mass casualty events.<sup>51 52 53</sup> The data are based on a large North American region and may underestimate losses in populations with more intentional injuries.<sup>54</sup> The study does not account for patients who died at the scene, those who moved away (and assumed fine), or others hurt by a culture of fear.<sup>55 56</sup> Disability data may also underestimate additional losses from missed days at work, career advancement, family relationships, emotional distress, and trauma recidivism.<sup>57</sup> The design was not randomized, prospective, or blinded and cannot establish whether an observed correlation indicates possible causality (E-value = 2.80).<sup>58</sup>

The findings are also prone to distortion in public debates about firearms.<sup>59</sup> Specifically, the observed rates of long-term disability do not directly support or refute calls for gun control.<sup>60</sup> The study does not address safe storage, background checks, licensing policies, waiting periods, safety training, or other particular injury prevention strategies.<sup>61 62</sup> The analysis provides no insights on the benefits of gun ownership for those who gain security and experience no adverse incidents.<sup>63</sup> The research cannot settle the unceasing tension between safety and liberty because moral imperatives extend beyond a biomedical perspective.<sup>64 65</sup> The science, furthermore, is easily manipulated by lobbying groups who have high financial stakes and deep passionate membership.<sup>66</sup>

1 An additional caveat is that our data do not explain the mechanisms where gun  
2 injury might lead to higher disability after intentional rather than unintentional incidents.  
3 A myriad of biomedical and social factors could contribute including severity of injury,  
4 concurrent mental illnesses, and background community supports.<sup>67 68 69 70</sup> Another  
5 potential contributor is a possible labeling effect from identifying as a victim that leads to  
6 reduced self-esteem, decreased self-efficacy, and depression.<sup>71 72 73 74</sup> A further possibility  
7 may be the nature of blame, concept of responsibility, and a negative spiral of  
8 disempowerment with anxiety.<sup>75 76 77</sup> Regardless of mechanisms, our data suggests the  
9 prognosis is shared by self-inflicted and inter-personal assault incidents.<sup>78 79</sup>  
10  
11  
12  
13  
14  
15  
16  
17  
18  
19

20 The uncertain reasons underlying long-term disability suggest the need for a multi-  
21 modal approach to trauma survivorship.<sup>80</sup> This might include follow-up care from  
22 surgeons, psychiatrists, family physicians, physiotherapists, social workers, occupational  
23 therapists, spiritual care workers, and other allied professionals.<sup>81</sup> Clinical priorities could  
24 include the management of pain, depression, anxiety, sleep, and substance abuse.<sup>82 83 84</sup>  
25 Some additional counseling might also be necessary for workforce participation including  
26 a role for a navigator to negotiate between a disabled survivor and a potential employer.<sup>85</sup>  
27 To the best of our knowledge, no trauma center offers such a holistic follow-up clinic for  
28 adults after gun injury.<sup>86 87</sup> Our study highlights a substantial need to support survivors.<sup>88</sup>  
29  
30  
31  
32  
33  
34  
35  
36  
37  
38  
39  
40  
41  
42  
43  
44  
45  
46  
47  
48  
49  
50  
51  
52  
53  
54  
55  
56  
57  
58  
59  
60

## ACKNOWLEDGMENTS

We thank the following for helpful comments: Leonard Evans, Fizza Manzoor, Robert Redelmeier, Filippo Raso, Lee Ross, Charles Tator, and Albert Wu.

## FUNDING

This project was supported by a Canada Research Chair in Medical Decision Sciences and the Canadian Institutes of Health Research. The views expressed are those of the authors and do not necessarily reflect the Ontario Ministry of Health.

## CONFLICTS

The funding organizations had no role in the design and conduct of the study; collection, management, analysis, or interpretation of the data; and preparation, review, or approval of the manuscript. All authors have no financial or personal relationships or affiliations that could influence the decisions and work on this manuscript.

## CONTRIBUTIONS

The senior author (DAR) wrote the first draft. The first and last authors (SR, DAR) contributed to study design and background scholarship. All authors (SR, DT, DAR) contributed to manuscript preparation, data analysis, results interpretation, critical revisions, and the final decision to submit.

## ETHICS STATEMENT

The study protocol was approved by the Research Ethics Board of Sunnybrook Health Sciences Center including a waiver for direct patient consent.

## DATA AVAILABILITY

Patient privacy laws prohibit making individual-level data publicly available. Aggregate data are shown in the paper and appendix. Researchers interested in replicating or extending the work can seek access to individual-level data through the Institute for Clinical Evaluative Sciences (contact <http://www.ices.on.ca>).

## REFERENCES

- 1 Pew Research Center. Why own a gun? Protection is now top reason. 12 March 2013. Accessed at [www.people-press.org/2013/03/12/why-own-a-gun-protection-is-now-top-reason/](http://www.people-press.org/2013/03/12/why-own-a-gun-protection-is-now-top-reason/) on 1 September 2019.
- 2 Adam Cotter. Firearms and violent crime in Canada, 2012 [Internet]. Statistics Canada. 2012 [cited 2019 Feb 12]. Available from: <https://www150.statcan.gc.ca/n1/pub/85-002-x/2014001/article/11925-eng.htm>
- 3 Yanchar NL, Beno S; Canadian Association of Emergency Physicians and the Trauma Association of Canada. Can we do better?: A Canadian perspective on firearm injury prevention. *Ann Surg.* 2018 Jun;267(6):1009-1010.
- 4 Nand D, Naghavi M, Marczak LB, Kutz M, Shackelford KA, Arora M, et al. Global mortality from firearms, 1990-2016. *JAMA - J Am Med Assoc.* 2018;320(8):792-814.
- 5 World Health Organization Department of Health Statistics and Information Systems. WHO Mortality Data Base [Internet]. [cited 2019 Feb 12]. Available from: [http://apps.who.int/healthinfo/statistics/mortality/causeofdeath\\_query/](http://apps.who.int/healthinfo/statistics/mortality/causeofdeath_query/)
- 6 Corso PS, Mercy JA, Simon TR, Finkelstein EA, Miller TR. Medical costs and productivity losses due to interpersonal and self-directed violence in the United States. *Am J Prev Med.* 2007;32(6):474-482.
- 7 Raza S, Redelmeier DA. Gunshot to the Head. *Am J Med.* 2018;131(1):e7-8.
- 8 Ajmal S, Enam SA, Shamim MS. Neurogenic claudication and radiculopathy as delayed presentations of retained spinal bullet. *Spine J.* 2009;9(10):e5-e8.
- 9 Wiseman T, Foster K, Curtis K. Mental health following traumatic physical injury: An integrative literature review. *Injury.* 2013;44:1383-90.
- 10 Substance Abuse and Mental Health Services Administration. Mass violence and behavioral health. Disaster Technical Assistance Center Supplemental Research Bulletin. 2017; 1-18. Available from: <https://www.samhsa.gov/sites/default/files/dtac/srb-mass-violence-behavioral-health.pdf>
- 11 Smith RN, Seamon MJ, Kumar V, Robinson A, Shults J, Reilly PM, et al. Lasting impression of violence: Retained bullets and depressive symptoms. *Injury.* 2018;49(1):135-40.
- 12 Lee J. Wounded: Life after the shooting. *Ann Am Acad Pol Soc Sci.* 2012;642(1):244-57.

- 
- 1  
2  
3 13 Eligon J. One bullet can kill, but sometimes 20 don't, survivors show. *New York Times*  
4 [Internet]. 2008 Apr 3; Available from:  
5 <https://www.nytimes.com/2008/04/03/nyregion/03shot.html>  
6
- 7 14 Ringburg AN, Polinder S, Van Ierland MCP, Steyerberg EW, Van Lieshout EMM, Patka P, et al.  
8 Prevalence and prognostic factors of disability after major trauma. *J Trauma - Inj Infect Crit*  
9 *Care*. 2011;70(4):916–22.  
10
- 11 15 Laughlin MD, Belmont PJ, Lanier PJ, Bader JO, Waterman BR, Schoenfeld AJ. Occupational  
12 outcomes following combat-related gunshot injury. *Int J Surg*. 2017;48:286-290.  
13
- 14 16 Stevenson T, Carr DJ, Penn-Barwell JG, Ringrose TJ, Stapley SA. The burden of gunshot  
15 wounding of UK military personnel in Iraq and Afghanistan from 2003-14. *Injury*.  
16 2018;49(6):1064-1069.  
17
- 18 17 Redelmeier DA, Blair PJ. Survivors of motor vehicle trauma - an analysis of seat belt use and  
19 health care utilization. *J Gen Intern Med*. 1993;8(4):199–203.  
20
- 21 18 Mills BM, Nurius PS, Matsueda RL, Rivara FP, Rowhani-Rahbar A. Prior arrest, substance use,  
22 mental disorder, and intent-specific firearm injury. *Am J Prev Med*. 2018;55(3):298–307.  
23
- 24 19 Rattan R, Parreco J, Namias N, Pust GD, Yeh DD, Zakrison TL. Hidden costs of hospitalization  
25 after firearm injury: national analysis of different hospital readmission. *Ann Surg*.  
26 2018;267(5):810–5.  
27
- 28 20 Statistics Canada. Canada at a Glance 2010 - Population [Internet]. 2010 [cited 2019 Mar 17].  
29 Available from: <https://www150.statcan.gc.ca/n1/pub/12-581-x/2010000/pop-eng.htm>  
30
- 31 21 About Ontario [Internet]. Government of Ontario. 2019 [cited 2019 Mar 17]. Available from:  
32 <https://www.ontario.ca/page/about-ontario>  
33
- 34 22 Ministry of Natural Resources and Forestry. Ontario Hunting Regulations Summary [Internet].  
35 2019 [cited 2019 Feb 13]. Available from: <https://www.ontario.ca/document/ontario-hunting-regulations-summary>  
36
- 37 23 Chan B, Schull MJ, Schultz SE. Atlas report: Emergency department services in Ontario.  
38 Institute for Clinical Evaluate Sciences. 2001. Available from: <https://www.ices.on.ca/flip-publication/emergency-department-services-in-ontario/files/assets/basic-html/index.html#54>  
39
- 40 24 National Ambulatory Care Reporting System. NACRS Emergency Department Visits and  
41 Length of Stay, 2017–2018 [Internet]. 2019 [cited 2019 Mar 17]. Available from:  
42 <https://www.cihi.ca/en/quick-stats>  
43
- 44 25 Wayne K. Gunshot wound reporting mandatory in Ontario. *CMAJ*. 2005 173 (3) 242-242-a.  
45  
46  
47  
48  
49  
50  
51  
52  
53  
54  
55  
56  
57  
58  
59  
60

- 1  
2  
3 26 Ministry of Community and Social Services. Ontario Ministry of Children, Community and  
4 Social Services. 2019 [cited 2019 Mar 17]. Available from:  
5 <https://www.mcscs.gov.on.ca/en/mcscs/>  
6  
7 27 Macpherson AK, Schull MJ. Penetrating trauma in Ontario emergency departments: a  
8 population-based study. *CJEM*. 2007;9(1):16-20.  
9  
10 28 Institute for Clinical Evaluative Sciences. Data Dictionary [Internet]. 2019. Available from:  
11 <https://datadictionary.ices.on.ca/Applications/DataDictionary/Default.aspx>  
12  
13 29 National Ambulatory Care Reporting System. NACRS Emergency Department Visits and  
14 Length of Stay, 2017–2018 [Internet]. 2019 [cited 2019 Mar 17]. Available from:  
15 <https://www.cihi.ca/en/quick-stats>  
16  
17 30 Parachute. Ontario Injury Data Report 2018. Parachute: Toronto, Ontario. 2018.  
18  
19 31 Ardal S. Health analyst's toolkit. Toronto, 2012. Available from:  
20 [http://www.health.gov.on.ca/english/providers/pub/healthanalytics/health\\_toolkit/health\\_toolkit.pdf](http://www.health.gov.on.ca/english/providers/pub/healthanalytics/health_toolkit/health_toolkit.pdf)  
21  
22 32 CIHI. Discharge abstract database. 2019. Available from: [https://www.cihi.ca/en/discharge-](https://www.cihi.ca/en/discharge-abstract-database-metadata)  
23 [abstract-database-metadata](https://www.cihi.ca/en/discharge-abstract-database-metadata)  
24  
25 33 Drucker AM, Thiruchelvam D, Redelmeier DA. Eczema and subsequent suicide: a matched  
26 case-control study. *BMJ Open*. 2018;8(11):e023776.  
27  
28 34 Newgard CD, Sanchez BJ, Bulger EM, Brasel KJ et al. A geospatial analysis of severe firearm  
29 injuries compared to other injury mechanisms: event characteristics, location, timing, and  
30 outcomes. *Acad Emerg Med*. 2016; 23(5): 554-65.  
31  
32 35 Gani F, Sakran J V., Canner JK. Emergency department visits for firearm-related injuries in the  
33 United States, 2006-14. *Health Aff*. 2017;36(10):1729–38.  
34  
35 36 Mills BM, Nurius PS, Matsueda RL, Rivara FP, Rowhani-Rahbar A. Prior arrest, substance use,  
36 mental disorder, and intent-specific firearm injury. *Am J Prev Med*. 2018;55(3):298–307  
37  
38 37 Sauaia A, Gonzalez E, Moore HB, Bol K, Moore EE. Fatality and severity of firearm injuries in a  
39 denver trauma center, 2000-2013. *JAMA*. 2016;315:2465-7.  
40  
41 38 Saunders NR, Lee H, Macpherson A, Guan J, Guttman A. Risk of firearm injuries among  
42 children and youth of immigrant families. *CMAJ*. 2017; 189(12):E452-E458.  
43  
44 39 Kapral MK, Fang J, Chan C, Alter DA, Bronskill SE, Hill MD, et al. Neighborhood income and  
45 stroke care and outcomes. *Neurology*. 2012;79(12):1200–7.  
46  
47  
48  
49  
50  
51  
52  
53  
54  
55  
56  
57  
58  
59  
60

- 1  
2  
3 40 Riddell CA, Harper S, Cerda M, Kaufman JS. Comparison of rates of firearm and non-firearm  
4 homicide and suicide in black and white non-Hispanic men, by U.S. State. *Ann Intern Med*.  
5 2018;168(10):712–20.  
6  
7 41 Government of Ontario Ministry of Health and Long-Term Care. OHIP Schedule of Benefits  
8 and Fees. Ontario Health Insurance Plan; 2018 [cited 2019 Mar 17]. Available from:  
9 <http://www.health.gov.on.ca/en/pro/programs/ohip/sob/>  
10  
11  
12 42 Ontario Ministry of Health and Long-Term Care. Ontario Health Insurance Plan. Toronto, ON:  
13 Ontario Ministry of Health and Long-Term Care; 2016. Available:  
14 <http://www.health.gov.on.ca/en/public/programs/ohip/>. Accessed October 12, 2016.  
15  
16  
17 43 Government of Ontario Ministry of Health and Long-Term Care. OHIP schedule of benefits  
18 and fees. Ontario Health Insurance Plan; 2018 [cited 2019 Mar 17]. Available from:  
19 <http://www.health.gov.on.ca/en/pro/programs/ohip/sob/>  
20  
21  
22 44 Reece SCM, Thiruchelvam D, Redelmeier DA. Medical emergencies in farmers. *Journal of*  
23 *Rural Health*. 2018. 0: 1-7.  
24  
25  
26 45 Galea S. Physicians' voices on gun violence and other important public health issues. *JAMA*.  
27 2019;321(2):141-2.  
28  
29  
30 46 Ranney ML, Betz EM, Dark C. #ThisIsOurLane-firearm safety as health care's highway. *NEJM*.  
31 2019; 380(5): 405-407.  
32  
33  
34 47 Austin PC, Lee DS, Fine JP. Introduction to the analysis of survival data in the presence of  
35 competing risks. *Circulation*. 2016;133(6):601–9.  
36  
37  
38 48 Austin PC, Fine JP. Practical recommendations for reporting Fine-Gray model analyses for  
39 competing risk data. *Stat Med*. 2017;36(27):4391-4400.  
40  
41  
42 49 Wintemute GJ, Wright MA. Initial and subsequent hospital costs of firearm injuries. *J Trauma*.  
43 1992;33(4):556–60.  
44  
45  
46 50 Gabbe BJ, Simpson PM, Harrison JE, Lyons RA, Ameratunga S, Ponsford J, et al. Return to  
47 work and functional outcomes after major trauma who recovers, when, and how well? *Ann*  
48 *Surg*. 2016;263(4):623–32.  
49  
50  
51 51 Studdert DM, Zhang Y, Rodden JA, Hyndman RJ, Wintemute GJ. Handgun acquisitions in  
52 California after two mass shootings. *Ann Intern Med*. 2017;166(10):698–706.  
53  
54  
55 52 Wintemute GJ. How to stop mass shootings. *N Engl J Med*. 2018;379(13):1193-1196.  
56  
57  
58 53 Fleegler E. Mass shootings and the numbing of America. *JAMA Intern Med*. 2019;179(5):610-  
59 1.  
60

1  
2  
3 54 Yanchar NL, Beno S; Canadian Association of Emergency Physicians and the Trauma  
4 Association of Canada. Can we do better?: A Canadian perspective on firearm injury prevention.  
5 *Ann Surg.* 2018 Jun;267(6):1009-1010.  
6

7 55 Larsen DA, Lane S, Jennings-Bey T, Haygood-El A, Brundage K, Rubinstein RA. Spatio-temporal  
8 patterns of gun violence in Syracuse, New York 2009-2015. *PLoS One.* 2017;12(3): e0173001.  
9

10 56 Rowhani-Rahbar A, Zatzick DF, Rivara FP. Long-lasting consequences of gun violence and  
11 mass shootings. *JAMA.* 2019; 321:1765-6.  
12  
13

14 57 Diez C, Kurland RP, Rothman EF, Bair-Merritt M, Fleegler E, Xuan Z, et al. State intimate  
15 partner violence-related firearm laws and intimate partner homicide rates in the United States,  
16 1991 to 2015. *Ann Intern Med.* 2017;167(8):536–43.  
17  
18

19 58 VanderWeele TJ, Ding P. Sensitivity analysis in observational research: introducing the E-  
20 value. *Ann Intern Med.* 2017;167(4):268-274.  
21  
22

23 59 Maa J, Darzi A. Firearm injuries and violence prevention - the potential power of a surgeon  
24 general's report. *N Engl J Med.* 2018;379(5):408-410.  
25  
26

27 60 Bauchner H, Rivara FP, Bonow RO, Bressler NM, Disis MLN, Heckers S, Josephson SA, Kibbe  
28 MR, Piccirillo JF, Redberg RF, Rhee JS, Robinson JK. Death by Gun Violence-A Public Health  
29 Crisis. *JAMA.* 2017;318(18):1763-1764.  
30  
31

32 61 Matthay EC, Galin J, Rudolph KE, Farkas K, Wintemute GJ, Ahern J. In-State and interstate  
33 associations between gun shows and firearm deaths and injuries. *Ann Intern Med.*  
34 2017;167(12):837–44.  
35  
36

37 62 Institute of Medicine, National Research Council. Priorities for research to reduce the threat  
38 of firearm-related violence. Washington, DC: The National Academies Press.  
39 <http://www.nap.edu/read/18319>. Published 2013. Accessed April 15, 2019.  
40  
41

42 63 Champion EW, Morrissey S, Malina D, Sacks CA, Drazen JM. After the mass shooting in Las  
43 Vegas - finding common ground on gun control. *N Engl J Med.* 2017;377(17):1679-1680.  
44

45 64 Butkus R, Weissman A. Internists' attitudes toward prevention of firearm injury. *Ann Intern*  
46 *Med.* 2014;160(12):821–7.  
47  
48

49 65 Malina D, Morrissey S, Champion EW, Hamel MB, Drazen JM. Rooting out gun violence. *N Engl*  
50 *J Med.* 2016;374(2):175-6.  
51

52 66 Cunningham RM, Zimmerman MA, Carter PM. Money, politics and firearm safety. *JAMA*  
53 *Network Open.* 2019;2(2):e187823.  
54  
55  
56  
57  
58  
59  
60



- 1  
2  
3  
4  
5  
6  
7  
8  
9  
10  
11  
12  
13  
14  
15  
16  
17  
18  
19  
20  
21  
22  
23  
24  
25  
26  
27  
28  
29  
30  
31  
32  
33  
34  
35  
36  
37  
38  
39  
40  
41  
42  
43  
44  
45  
46  
47  
48  
49  
50  
51  
52  
53  
54  
55  
56  
57  
58  
59  
60
- 
- <sup>67</sup> Van Delft-Schreurs CCHM, Van Bergen JJM, De Jongh MAC, Van De Sande P, Verhofstad MHJ, De Vries J. Quality of life in severely injured patients depends on psychosocial factors rather than on severity or type of injury. *Injury*. 2014;45(1):320–6.
- <sup>68</sup> Garber BG, Rusu C, Zamorski MA, Boulos D. Occupational outcomes following mild traumatic brain injury in Canadian military personnel deployed in support of the mission in Afghanistan: a retrospective cohort study. *BMJ Open*. 2016;6(5):e010780.
- <sup>69</sup> Goldstick JE, Carter PM, Walton MA, Dahlberg LL, Sumner SA, Zimmerman MA, et al. Development of the SaFETy score: a clinical screening tool for predicting future firearm violence risk. *Ann Intern Med*. 2017;166(10):707–14.
- <sup>70</sup> Rousseau C, Hassan G, Frounfelker R. The role of physicians in the violence epidemic. *CMAJ*. 2019; 191: (23): E644.
- <sup>71</sup> Aronson E. The theory of cognitive dissonance: a current perspective. *Adv Exper Soc Psychol* 1969;4:1-34.
- <sup>72</sup> Martz E. Death anxiety as a predictor of posttraumatic stress levels among individuals with spinal cord injuries. *Death Stud*. 2004;28(1):1-17.
- <sup>73</sup> Mario G, Philipp S, Marianne H. Victimization experiences and the stabilization of victim sensitivity. *Front Psychol*. 2015;6:439.
- <sup>74</sup> Patton D, Sodhi A, Affinati S, Lee J, Crandall M. Post-discharge needs of victims of gun violence in Chicago: a qualitative study. *J Interpers Violence*. 2019;34(1):135–55.
- <sup>75</sup> Shaver KG. *The attribution of blame: Causality, responsibility, and blameworthiness*. New York: Springer. 1985.
- <sup>76</sup> Liebschutz J, Schwartz S, Hoyte J, Conoscenti L, Christian AB, Muhammad L, et al. A chasm between injury and care: Experiences of black male victims of violence. *J Trauma - Inj Infect Crit Care*. 2010;69(6):1372–8.
- <sup>77</sup> Callebaut L, Molyneux P, Alexander T. The relationship between self-blame for the onset of a chronic physical health condition and emotional distress: a systematic literature review. *Clin Psychol Psychother*. 2017;24(4):965–86.
- <sup>78</sup> Bingenheimer JB, Brennan RT, Earls FJ. Firearm violence exposure and serious violent behavior. *Science*. 2005;308(5726):1323–6.
- <sup>79</sup> Spitzer SA, Vail D, Tennakoon L, Rajasingh C, Spain DA, Weiser TG. Readmission risk and costs of firearm injuries in the United States, 2010-2015. *PLoS One*. 2019. 24;14(1):e0209896.

- 1  
2  
3 80 Hobfoll SE, Watson P, Bell CC, Bryant RA, Brymer MJ, Friedman MJ, et al. Five essential  
4 elements of immediate and mid-term mass trauma intervention: empirical evidence. *Psychiatry*  
5 *Interpers Biol Process*. 2007;70(4):283–315.  
6  
7 81 Walter E, Curtis K. The role and impact of the specialist trauma nurse: An integrative review. *J*  
8 *Trauma Nurs*. 2015;22(3):153-69.  
9  
10  
11 82 Lee J. The pill hustle: risky pain management for a gunshot victim. *Soc Sci Med*. 2013;99:162-  
12 8.  
13  
14 83 Wade D, Crompton D, Howard A, Stevens N, Metcalf O, Brymer M, et al. Skills for  
15 psychological recovery: evaluation of a post-disaster mental health training program. *Disaster*  
16 *Health*. 2014; 2(3-4):138–145.  
17  
18 84 Patton D, Sodhi A, Affinati S, Lee J, Crandall M. Post-discharge needs of victims of gun  
19 violence in Chicago: a qualitative study. *J Interpers Violence*. 2019;34(1):135–55.  
20  
21 85 Shaw W, Hong QN, Pransky G, Loisel P. A literature review describing the role of return-to-  
22 work coordinators in trial programs and interventions designed to prevent workplace disability.  
23 *J Occup Rehabil*. 2008;18(1):2–15.  
24  
25 86 Khan F, Amatya B, Hoffman K. Systematic review of multidisciplinary rehabilitation in patients  
26 with multiple trauma. *British Journal of Surgery*. 2012;99(1):88–96.  
27  
28 87 Taichman DB, Bauchner H, Drazen JM, Laine C, Peiperl L. Firearm-related injury and death: a  
29 U.S. Health care crisis in need of health care professionals. *PLoS Med*. 2017;14(10): e1002430.  
30  
31 88 Stanbrook MB. Gun control: a health issue for which physicians rightfully advocate. *CMAJ*.  
32 2019; 191(16): E434–E435.  
33  
34  
35  
36  
37  
38  
39  
40  
41  
42  
43  
44  
45  
46  
47  
48  
49  
50  
51  
52  
53  
54  
55  
56  
57  
58  
59  
60

Table 1. Patient Characteristics

|                             |                 | Intentional *<br>(n = 506) | Unintentional<br>(n = 4,597) |
|-----------------------------|-----------------|----------------------------|------------------------------|
| <b>DEMOGRAPHIC</b>          |                 |                            |                              |
| Age                         | ≤ 29 years      | 361 (71.3%)                | 2,795 (60.8%)                |
|                             | ≥ 30 years      | 145 (28.7%)                | 1,802 (39.2%)                |
| Sex                         | male            | 469 (92.7%)                | 4,157 (90.4%)                |
|                             | female          | 37 (7.3%)                  | 440 (9.6%)                   |
| Home                        | urban           | 466 (92.1%)                | 3,702 (80.5%)                |
|                             | rural           | 40 (7.9%)                  | 895 (19.5%)                  |
| Socioeconomic quintile ¶    | highest         | 39 (7.7%)                  | 605 (13.2%)                  |
|                             | next to highest | 64 (12.6%)                 | 709 (15.4%)                  |
|                             | middle          | 95 (18.8%)                 | 870 (18.9%)                  |
|                             | next to lowest  | 104 (20.6%)                | 975 (21.2%)                  |
|                             | lowest          | 204 (40.3%)                | 1,438 (31.3%)                |
| <b>PAST YEAR HEALTHCARE</b> |                 |                            |                              |
| Hospital admission          | yes             | 8 (1.6%)                   | 107 (2.3%)                   |
|                             | no              | 498 (98.4%)                | 4,490 (97.7%)                |
| Emergency visit             | yes             | 191 (37.7%)                | 1,831 (39.8%)                |
|                             | no              | 315 (62.3%)                | 2,766 (60.2%)                |
| ≥7 outpatient visits        | yes             | 37 (7.3%)                  | 414 (9.0%)                   |
|                             | no              | 469 (92.7%)                | 4,183 (91.0%)                |
| Substance abuse diagnosis § | yes             | 42 (8.3%)                  | 235 (5.1%)                   |
|                             | no              | 464 (91.7%)                | 4,362 (94.9%)                |
| Mental health diagnosis †   | yes             | 105 (20.8%)                | 921 (20.0%)                  |
|                             | no              | 401 (79.2%)                | 3,676 (80.0%)                |
| <b>ACUTE INCIDENT</b>       |                 |                            |                              |
| Weapon                      | hand gun        | 55 (10.9%)                 | 207 (4.5%)                   |
|                             | long gun        | 26 (5.1%)                  | 399 (8.7%)                   |
|                             | uncertain       | 425 (84.0%)                | 3,991 (86.8%)                |
| Ambulance                   | yes             | 324 (64.0%)                | 1,084 (23.6%)                |
|                             | no              | 182 (36.0%)                | 3,513 (76.4%)                |

**Footnote**

\* denotes self-inflicted (codes X6·, X7·, X80 - X84) or assault (codes X85 - X89, X9·, Y0·)

¶ based on Statistics Canada algorithm

§ OHIP diagnostic codes 303 to 304

† OHIP diagnostic codes 290 to 316 (except 293, 294, 303, 304, 308, 310, 312)

Table 2. Acute Hospital Care

|                    |              | Intentional<br>(n = 506) | Unintentional<br>(n = 4,597) |
|--------------------|--------------|--------------------------|------------------------------|
| Hospital Admission | yes          | 412 (81.4%)              | 691 (15.0%)                  |
|                    | no           | 94 (18.6%)               | 3,906 (85.0%)                |
| Surgical Procedure | yes          | 260 (51.4%)              | 471 (10.2%)                  |
|                    | no           | 152 (30.0%)              | 220 (4.8%)                   |
|                    | no admission | 94 (18.6%)               | 3,906 (85.0%)                |
| Critical Care Unit | yes          | 187 (37.0%)              | 227 (4.9%)                   |
|                    | no           | 225 (44.5%)              | 464 (10.1%)                  |
|                    | no admission | 94 (18.6%)               | 3,906 (85.0%)                |
| Blood Transfusion  | yes          | 101 (20.0%)              | 149 (3.2%)                   |
|                    | no           | 311 (61.5%)              | 542 (11.8%)                  |
|                    | no admission | 94 (18.6%)               | 3,906 (85.0%)                |
| Days in Hospital   | median       | 6 (3-12)                 | 5 (3-10)                     |
|                    | no admission | --                       | --                           |
| Outcome            | death        | 35 (6.9%)                | 166 (3.6%)                   |
|                    | alive        | 471 (93.1%)              | 4,431 (96.4%)                |

Footnote

data are counts (percentage) of each column unless noted as median (inter-quartile range)

Table 3. Predictors of Disability After Gun Violence

| Characteristic                  | BASIC ANALYSIS * |                     | ADJUSTED ANALYSIS † |                     |
|---------------------------------|------------------|---------------------|---------------------|---------------------|
|                                 | Relative Risk    | Confidence Interval | Relative Risk       | Confidence Interval |
| <b>ACUTE INJURY</b>             |                  |                     |                     |                     |
| Intentional Injury              | 2.67             | 2.20 to 3.24        | 1.76                | 1.43 to 2.17        |
| Age group ¥                     | younger          | 1.12                | 0.95 to 1.31        | ---                 |
| Sex                             | male             | 0.98                | 0.76 to 1.27        | ---                 |
| Home Location π                 | urban            | 1.50                | 1.20 to 1.87        | 1.16                |
| Socioeconomic Quintile ¶        | higher           | 0.81                | 0.62 to 1.05        | ---                 |
|                                 | lower            | 1.59                | 1.28 to 1.97        | 1.62                |
| Incident Month ‡                | autumn           | 0.89                | 0.72 to 1.09        | ---                 |
|                                 | winter           | 0.96                | 0.78 to 1.19        | ---                 |
|                                 | spring           | 1.09                | 0.87 to 1.35        | ---                 |
| Incident Day §                  | weekend          | 1.09                | 0.93 to 1.27        | ---                 |
| Incident Hour #                 | morning          | 1.19                | 0.95 to 1.48        | ---                 |
|                                 | night            | 1.54                | 1.30 to 1.82        | 1.19                |
| Ambulance Transport             | yes              | 2.34                | 2.00 to 2.73        | 1.76                |
| <b>PAST HISTORY</b>             |                  |                     |                     |                     |
| Hospital Admission in Past      | yes              | 1.34                | 0.83 to 2.16        | ---                 |
| Emergency Visit in Past         | yes              | 1.18                | 1.02 to 1.38        | 1.10                |
| Outpatient visits in Past       | count            | 1.01                | 1.01 to 1.02        | 1.00                |
| Mental Health Diagnosis in Past | yes              | 2.03                | 1.72 to 2.39        | 1.82                |
| Substance Abuse in Past         | yes              | 2.79                | 2.21 to 3.52        | 2.12                |
| <b>ACUTE HOSPITAL CARE</b>      |                  |                     |                     |                     |
| Hospital Admission              | yes              | 2.75                | 2.35 to 3.22        | 1.58                |

**Footnotes**

\* no adjustment for baseline differences

† adjusted for all measures significant in univariate analysis

--- denotes estimates not significant in univariate or multivariate model

¥ referent is age  $\geq 30$  years

π referent is rural home location

¶ referent is middle socioeconomic quintile

‡ referent is summer

§ referent is weekday

# referent is afternoon

μ multivariate estimate unavailable due to collinearity

# Figure 1. Risk of Subsequent Disability

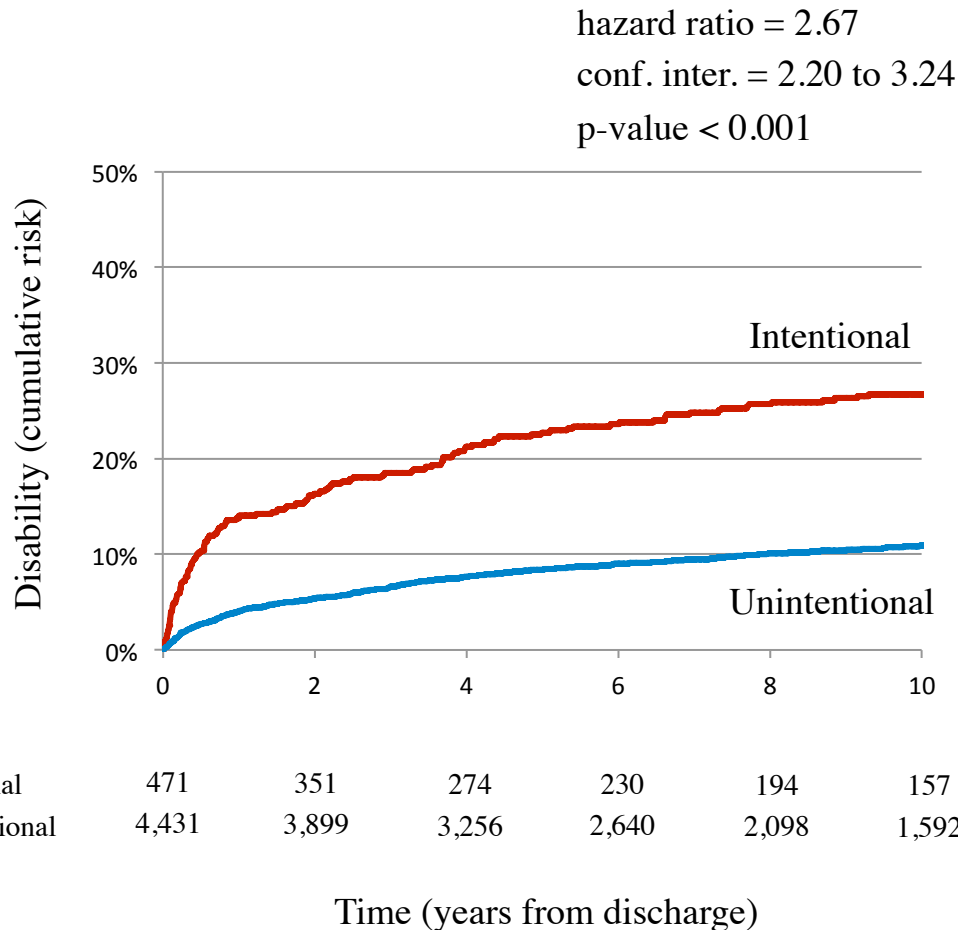

## Footnote

Cumulative incidence plots of absolute risk of disability following injury. X-axis shows time following injury spanning ten years. Y-axis shows cumulative incidence of disability. Intentional gun violence patients indicated by red line and unintentional gun violence patients indicated by blue line. Numerical counts show number of patients alive without disability at corresponding time. P-value based on Fine and Gray model. Results show increasing incidence of disability with time, particularly after intentional gun violence.

## Figure 2. Risk of Subsequent Death

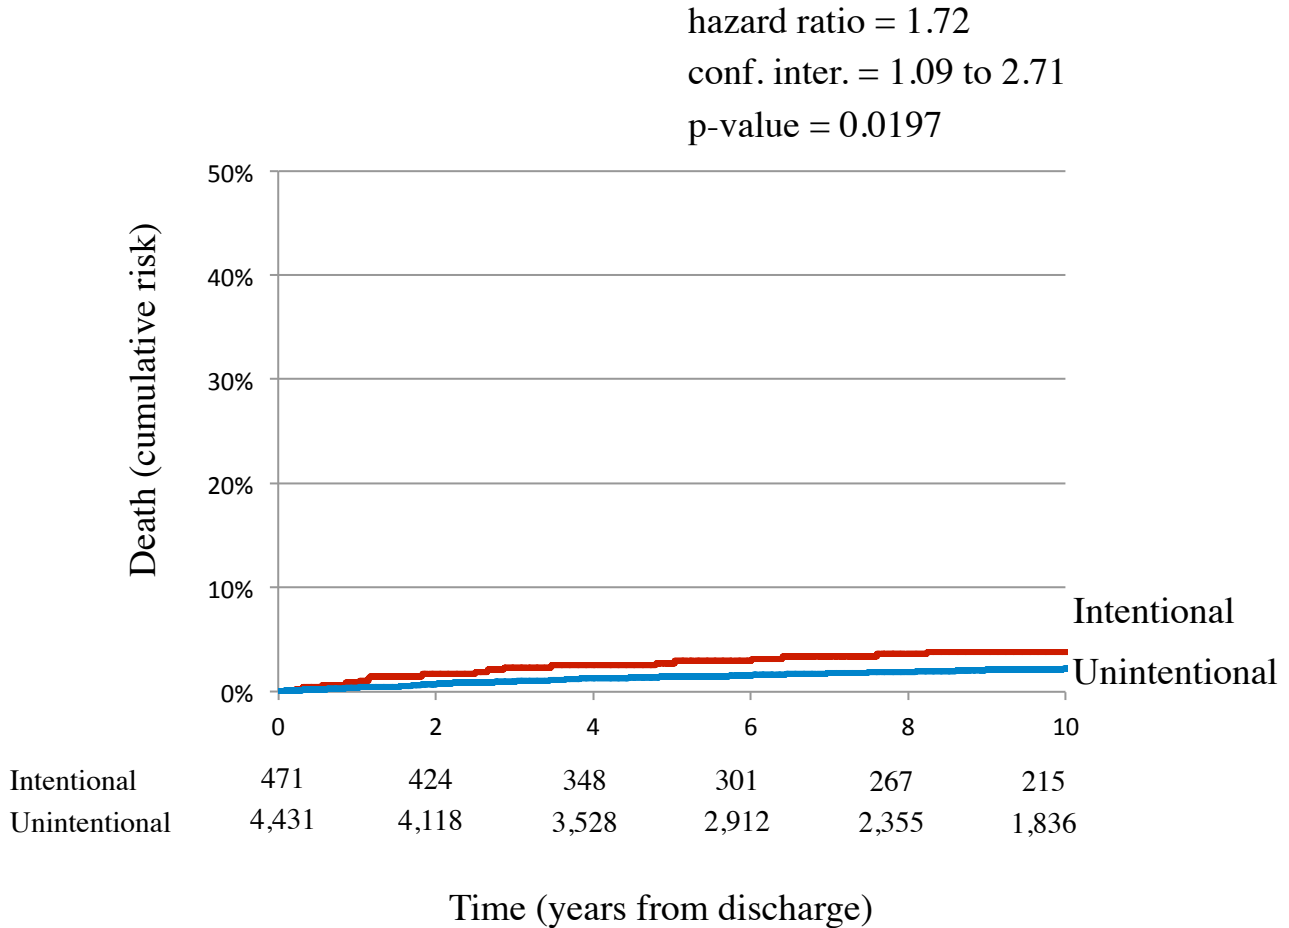

### Footnote

Cumulative incidence plots of absolute risk of death following injury. X-axis shows time following injury spanning ten years. Y-axis shows cumulative incidence of death following hospital discharge. Intentional gun violence patients indicated by red line and unintentional gun violence patients indicated by blue line. Numerical counts show number of patients alive at corresponding time. P-value based on Fine and Gray model. Results show low incidence of death over time, particularly after unintentional gun violence.

## Appendix §1. Incident Time and Prior Disability

|                    |                          | Intentional<br>(n = 506) | Unintentional<br>(n = 4,597) |
|--------------------|--------------------------|--------------------------|------------------------------|
| Year               | April 2002 - March 2010  | 275 (54.3%)              | 2,303 (50.1%)                |
|                    | April 2010 - March 2018  | 231 (45.7%)              | 2,294 (49.9%)                |
| Month              | spring                   | 104 (20.6%)              | 1,104 (24.0%)                |
|                    | summer                   | 146 (28.9%)              | 1,336 (29.1%)                |
|                    | autumn                   | 126 (24.9%)              | 1,326 (28.8%)                |
|                    | winter                   | 130 (25.7%)              | 831 (18.1%)                  |
| Day                | weekend                  | 203 (40.1%)              | 1,621 (35.3%)                |
|                    | weekday                  | 303 (59.9%)              | 2,976 (64.7%)                |
| Hour               | morning (0400h - 1159h)  | 77 (15.2%)               | 864 (18.8%)                  |
|                    | afternoon (1200h -1959h) | 148 (29.2%)              | 2,041 (44.4%)                |
|                    | night (2000h - 0400h)    | 281 (55.5%)              | 1,692 (36.8%)                |
| Prior Disability § | yes                      | 11 (2.2%)                | 81 (1.8%)                    |
|                    | no                       | 495 (97.8%)              | 4,516 (98.2%)                |

Footnote

data are count (percentage) of each column  
 § OHIP fee codes K050 to K054



Appendix §2 (page 1). Relative Risk of Disability After Intentional Gun Violence for Subgroups

|                         |           | Total Patients | Disability Cases | Relative Risk | Confidence Interval |
|-------------------------|-----------|----------------|------------------|---------------|---------------------|
| TOTAL COHORT            |           | 4,902          | 662              | 2.67          | 2.20 to 3.24        |
| DEMOGRAPHIC SUBGROUP    |           |                |                  |               |                     |
| Age                     | younger   | 3,050          | 429              | 2.82          | 2.25 to 3.53        |
|                         | older     | 1,852          | 233              | 2.28          | 1.56 to 3.34        |
| Sex                     | male      | 4,439          | 598              | 2.85          | 2.34 to 3.48        |
|                         | female    | 463            | 64               | 1.00          | 0.40 to 2.48        |
| Home                    | urban     | 4,000          | 573              | 2.55          | 2.08 to 3.12        |
|                         | rural     | 902            | 89               | 2.99          | 1.50 to 5.96        |
| Socioeconomic quintile  | higher    | 1,373          | 123              | 4.68          | 3.06 to 7.16        |
|                         | middle    | 931            | 102              | 2.29          | 1.38 to 3.81        |
|                         | lower     | 2,551          | 430              | 2.19          | 1.73 to 2.79        |
| ACUTE INCIDENT SUBGROUP |           |                |                  |               |                     |
| Incident Month          | autumn    | 1,401          | 174              | 3.11          | 2.12 to 4.56        |
|                         | winter    | 913            | 136              | 2.41          | 1.63 to 3.55        |
|                         | spring    | 1,162          | 155              | 2.54          | 1.66 to 3.90        |
|                         | summer    | 1,426          | 197              | 2.56          | 1.80 to 3.65        |
| Incident Day            | weekend   | 1,751          | 249              | 2.49          | 1.83 to 3.39        |
|                         | weekday   | 3,151          | 413              | 2.78          | 2.17 to 3.56        |
| Incident Hour           | morning   | 897            | 116              | 2.89          | 1.77 to 4.74        |
|                         | afternoon | 2,135          | 236              | 3.32          | 2.34 to 4.72        |
|                         | night     | 1,870          | 310              | 2.09          | 1.61 to 2.72        |
| Weapon                  | hand gun  | 244            | 35               | 2.05          | 1.02 to 4.12        |
|                         | long gun  | 416            | 34               | 2.16          | 0.77 to 6.06        |
|                         | uncertain | 4,242          | 593              | 2.74          | 2.23 to 3.36        |
| Ambulance Transport     | yes       | 1,230          | 276              | 1.81          | 1.41 to 2.32        |

1  
2  
3  
4  
5  
6  
7  
8  
9  
10  
11  
12  
13  
14  
15  
16  
17  
18  
19  
20  
21  
22  
23  
24  
25  
26  
27  
28  
29  
30  
31  
32  
33  
34  
35  
36  
37  
38  
39  
40  
41  
42  
43  
44  
45  
46  
47  
48  
49  
50  
51  
52  
53  
54  
55  
56  
57  
58  
59  
60

no 3,672 386 2.39 1.71 to 3.34

Confidential

Appendix §2 (page 2). Relative Risk of Disability After Intentional Gun Violence for Subgroups

|                            |                   | Total<br>Patients | Disabilit<br>y<br>Cases | Relative<br>Risk | Confidence<br>Interval |
|----------------------------|-------------------|-------------------|-------------------------|------------------|------------------------|
| TOTAL COHORT               |                   |                   |                         |                  |                        |
|                            |                   | 4,902             | 662                     | 2.67             | 2.20 to 3.24           |
| PAST HISTORY SUBGROUP      |                   |                   |                         |                  |                        |
| Hospital admission in past | yes               | 105               | 18                      | 4.85             | 1.27 to 18.6           |
|                            | no                | 4,797             | 644                     | 2.65             | 2.18 to 3.23           |
| Emergency visit            | yes               | 1,941             | 288                     | 2.63             | 1.95 to 3.55           |
|                            | no                | 2,961             | 374                     | 2.71             | 2.11 to 3.49           |
| Outpatient visits          | few ( $\leq 6$ )  | 4,482             | 590                     | 2.77             | 2.26 to 3.39           |
|                            | more ( $\geq 7$ ) | 420               | 72                      | 1.99             | 1.00 to 3.95           |
| Mental health diagnosis    | yes               | 971               | 212                     | 1.64             | 1.13 to 2.39           |
|                            | no                | 3,931             | 450                     | 3.20             | 2.56 to 4.00           |
| Substance abuse            | yes               | 265               | 82                      | 1.71             | 1.05 to 2.77           |
|                            | no                | 4,637             | 580                     | 2.71             | 2.20 to 3.34           |
| Mental or substance abuse  | Yes to<br>either  | 1,085             | 240                     | 1.81             | 1.29 to 2.55           |
|                            | no for both       | 3,817             | 422                     | 3.17             | 2.51 to 4.00           |
| ACUTE CARE SUBGROUP        |                   |                   |                         |                  |                        |
| Hospital Admission         | yes               | 1,047             | 263                     | 1.42             | 1.11 to 1.80           |
|                            | no                | 3,855             | 399                     | 2.09             | 1.30 to 3.37           |
| Surgical Procedure         | yes               | 706               | 186                     | 1.42             | 1.07 to 1.90           |
|                            | no                | 4,196             | 476                     | 2.52             | 1.89 to 3.36           |
| Critical Care Admission    | yes               | 366               | 110                     | 1.03             | 0.71 to 1.49           |
|                            | no                | 4,536             | 552                     | 2.74             | 2.17 to 3.45           |
| Blood Transfusion          | yes               | 216               | 78                      | 1.19             | 0.75 to 1.88           |
|                            | no                | 4,686             | 584                     | 2.58             | 2.08 to 3.19           |

1  
2  
3  
4  
5  
6  
7  
8  
9  
10  
11  
12  
13  
14  
15  
16  
17  
18  
19  
20  
21  
22  
23  
24  
25  
26  
27  
28  
29  
30  
31  
32  
33  
34  
35  
36  
37  
38  
39  
40  
41  
42  
43  
44  
45  
46  
47  
48  
49  
50  
51  
52  
53  
54  
55  
56  
57  
58  
59  
60

|                  |                   |       |     |      |              |
|------------------|-------------------|-------|-----|------|--------------|
| Days in Hospital | few ( $\leq 2$ )  | 4,070 | 437 | 2.26 | 1.57 to 3.26 |
|                  | more ( $\geq 3$ ) | 832   | 225 | 1.32 | 1.02 to 1.72 |

INJURY TYPE SUBGROUP

|                        |                |       |     |      |              |
|------------------------|----------------|-------|-----|------|--------------|
| Type of Intentionality | self-inflicted | 4,477 | 542 | 2.67 | 1.52 to 4.68 |
|                        | assault        | 4,856 | 649 | 2.67 | 2.18 to 3.26 |

Confidential
